# Supplementary figures and images for: Addition of Synthetic Biomaterials to Deproteinized Bovine Bone Mineral (DBBM) for Bone Augmentation—A Preclinical In Vivo Study
Source: MDPI journal article supplement (doi:10.3390/ijms231810516), 2022-09-10

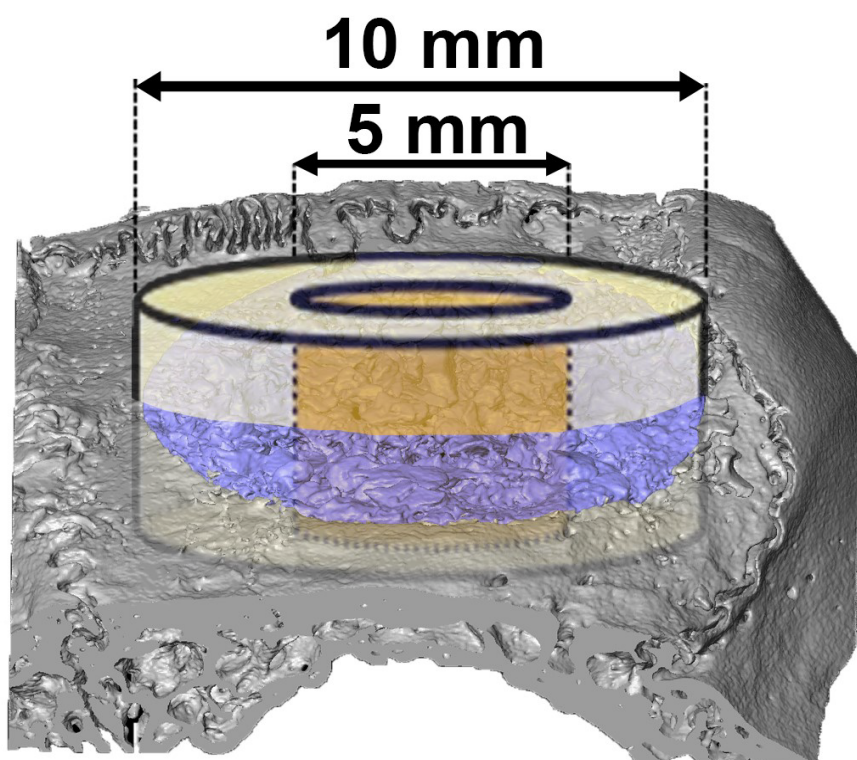

Supplement: s1 [file s1]
